# Supplementary material
Source: PubMed Central journal article supplement (PMC8776595)
Supplement: NIHMS1752795-supplement-3.pdf [file NIHMS1752795-supplement-3.pdf]

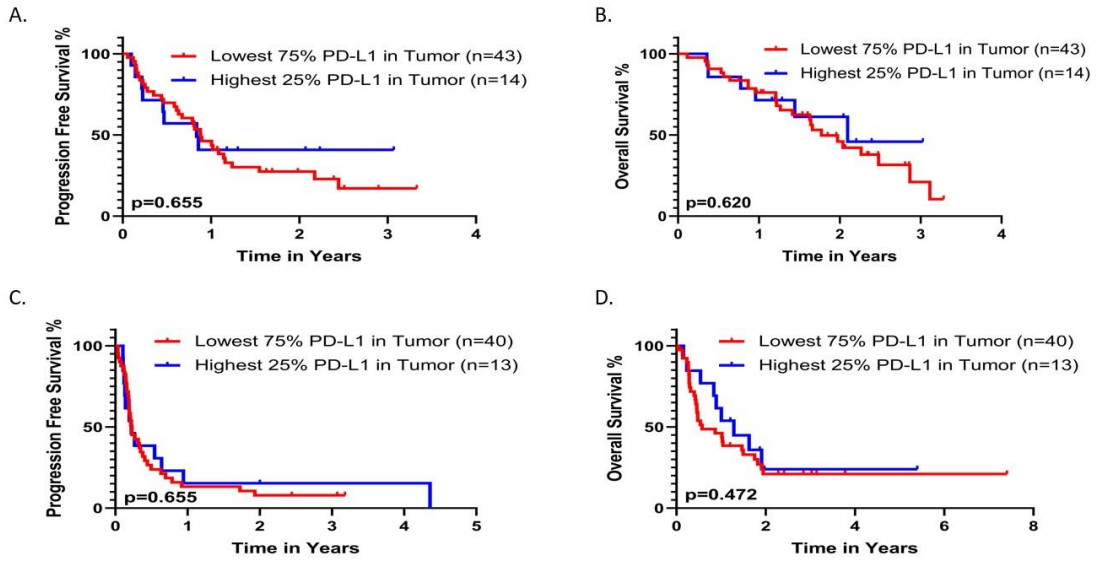

**Supplemental Figure 3.** PD-L1 in tumor by QIF does not correlate with OS or PFS in 1<sup>st</sup> line **A-B** and >1<sup>st</sup> line **C-D** of ITx treatment.
